# Supplementary material for: Enhancing the antibacterial activity of near-infrared light-triggered photothermal therapy using hybrid Au/ZnSe nanodumbbells
Source: Royal Society of Chemistry journal article supplement (doi:10.1039/d2nj03142f), 2022-01-01
Supplement: d2nj03142f1.pdf [file d2nj03142f1.pdf]

## Enhancing the antibacterial activity of near-infrared light-triggered photothermal therapy using hybrid Au/ZnSe nanodumbbells

Dong Wang,<sup>a</sup> Xinze Bi,<sup>b</sup> Lei Ji,<sup>a</sup> Yu Fan,<sup>a</sup> Hongzhi Wang<sup>\*b</sup> and Jiatao Zhang<sup>\*a</sup>

---

<sup>a</sup> Beijing Key Laboratory of Construction-Tailorable Advanced Functional Materials and Green Applications, Key Laboratory of Medical Molecule Science and Pharmaceutics Engineering, School of Materials Science & Engineering, Institute of Engineering Medicine, Beijing Institute of Technology, Beijing 100081, China

<sup>b</sup> State Key Laboratory of Heavy Oil Processing, College of New Energy, China University of Petroleum (East China), Qingdao 266580, China.

E-mail: zhangjt@bit.edu.cn

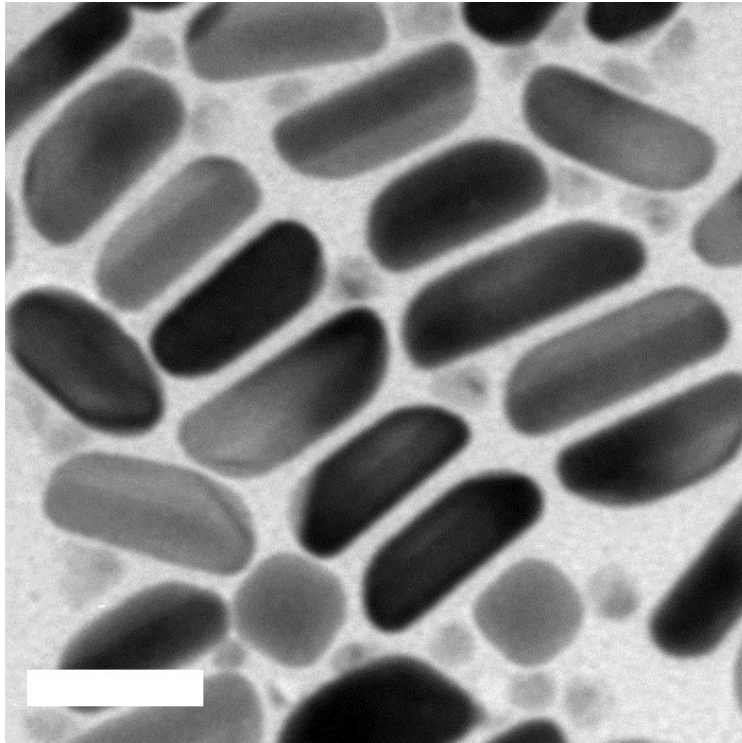

Figure S1. TEM image of Au@Ag NRs (scale bar = 50 nm).

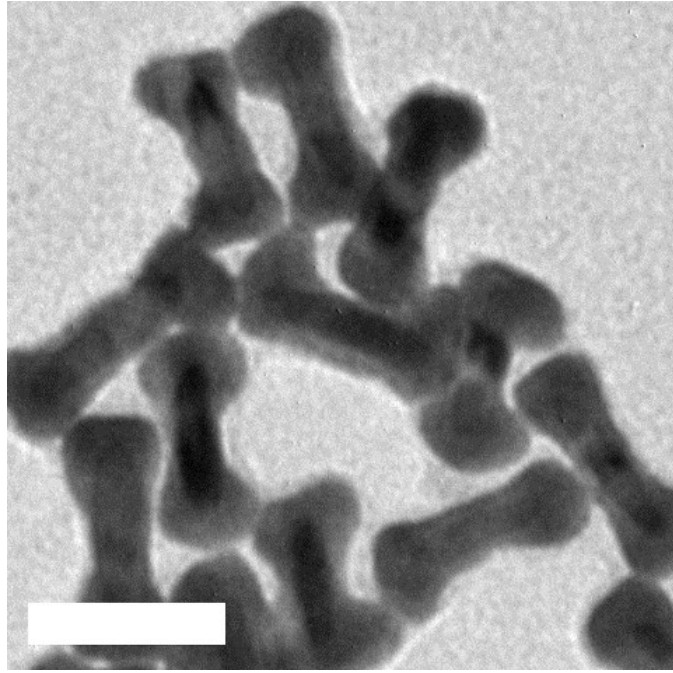

Figure S2. TEM image of Au/Ag<sub>2</sub>Se heteronanorods (scale bar = 50 nm).

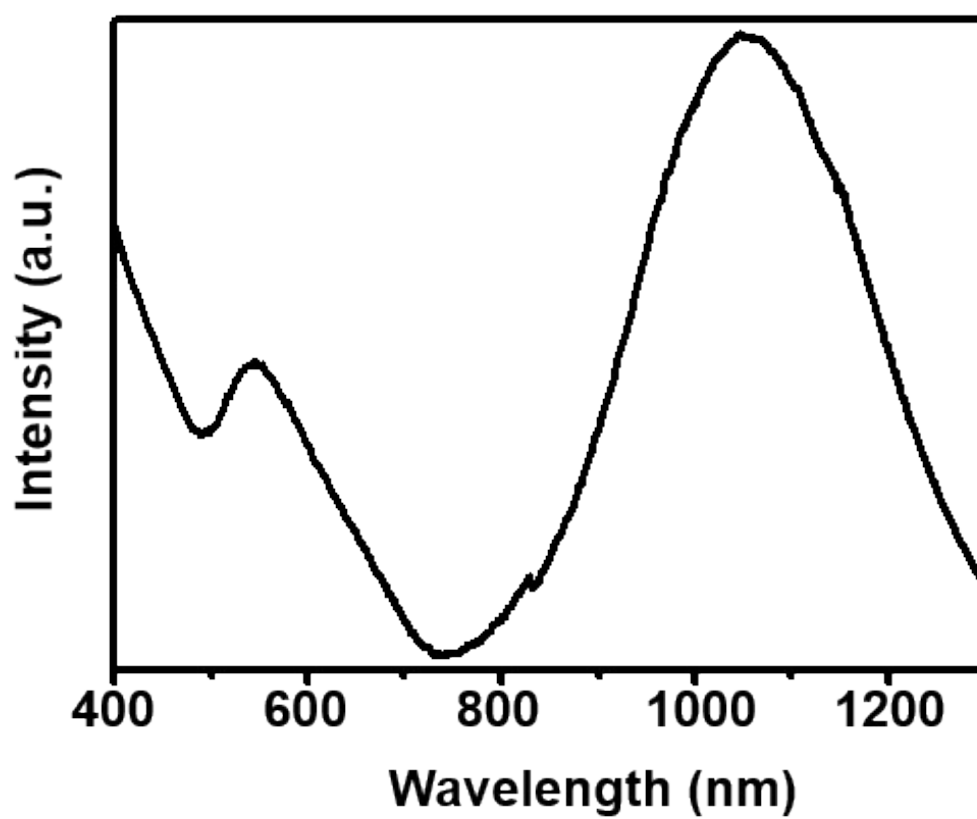

Figure S3. UV-vis spectra of AZN.

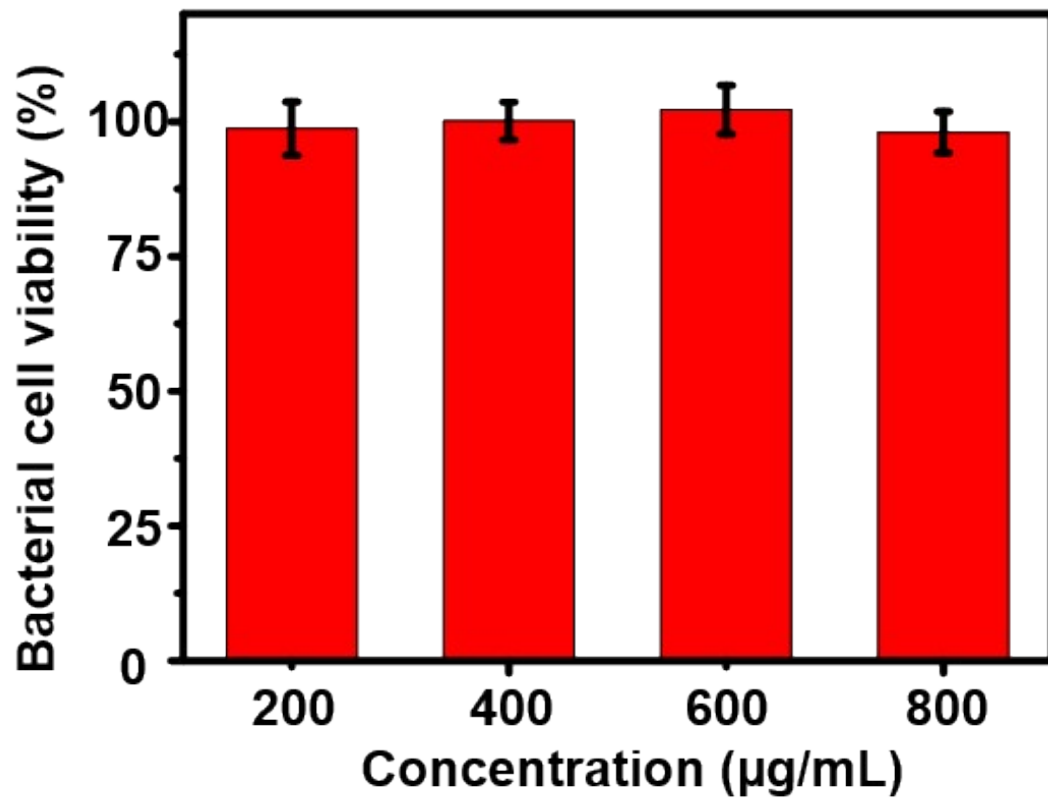

Figure S4. Bacterial survival rate after co-incubation of different concentrations of AZN and *S. aureus* in dark.

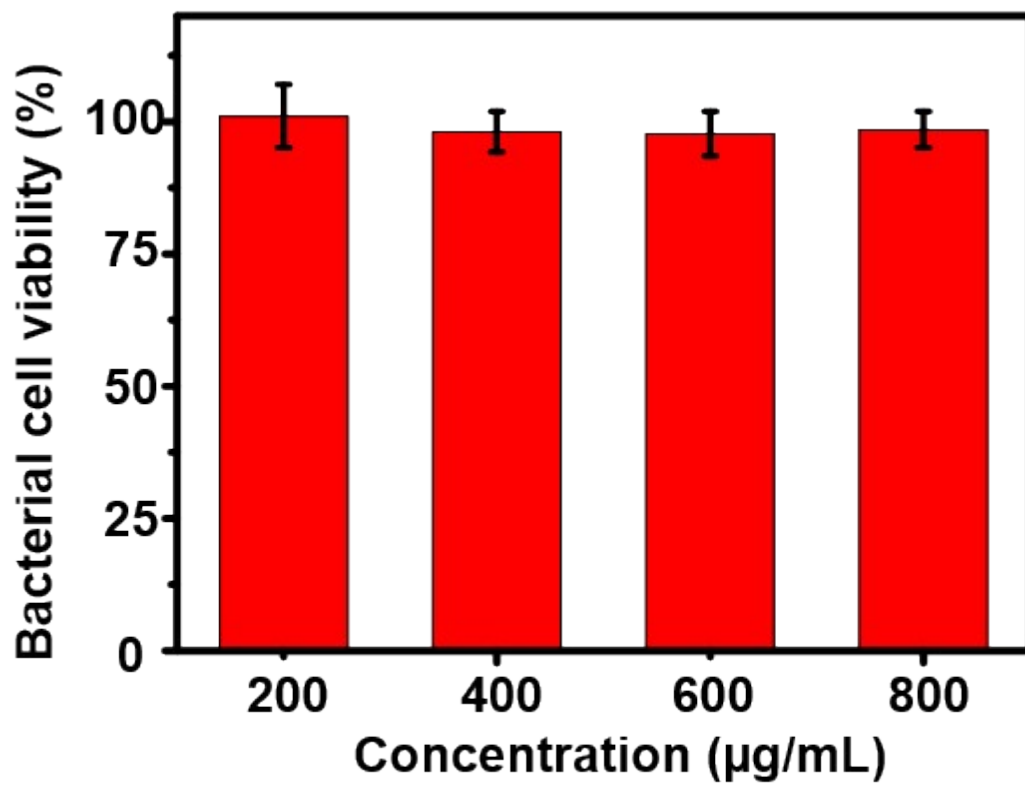

Figure S5. Bacterial survival rate after co-incubation of different concentrations of AZN and *E.coli* in dark.

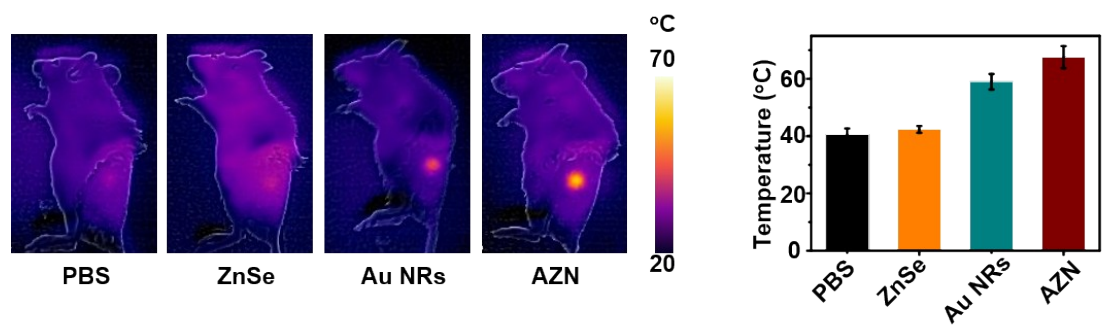

Figure S6. The temperature of the bacterial infection area after 15 min of irradiation recorded by infrared camera.

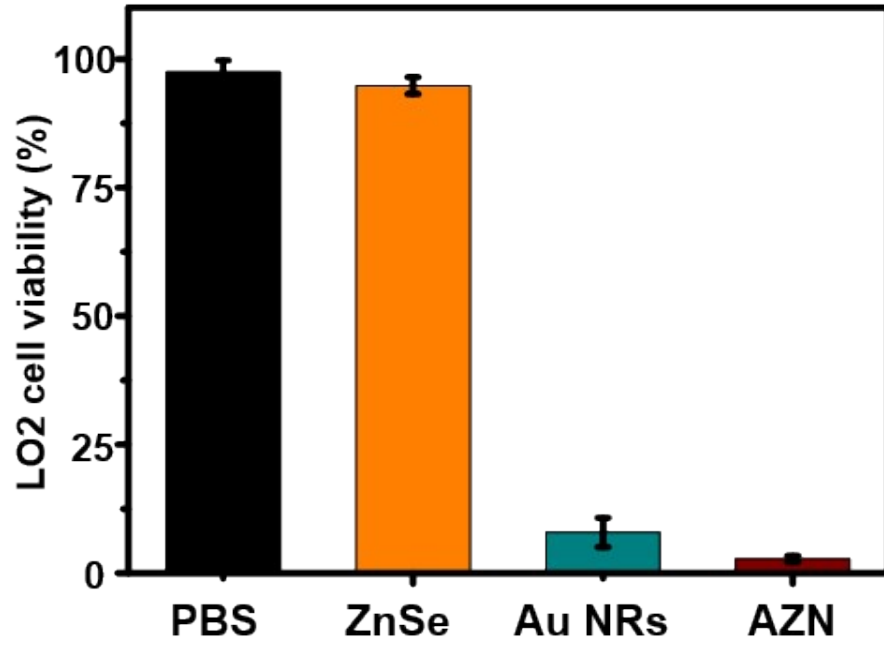

Figure S7. The viability of LO2 cells after co-incubation of different material at the concentrations of 100 ug/mL under 1064 nm laser for 15 min.



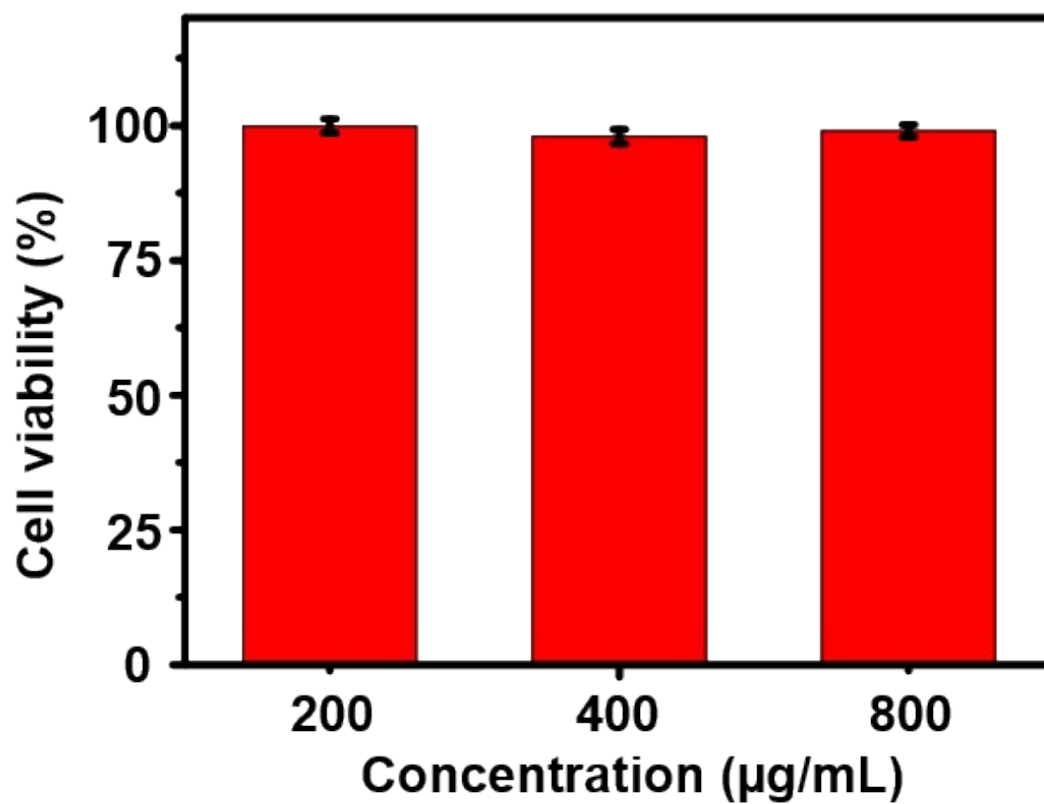

Figure S8. The viability of LO2 cells after co-incubation of different concentrations of AZN in dark.
